# Supplementary material
Source: publisher figshare collection journal article supplement (https://springernature.figshare.com/ndownloader/files/31081670)
Supplement: Supplementary file [file 31081670]

## **Supplemental Figures**

Number of Figures: 2

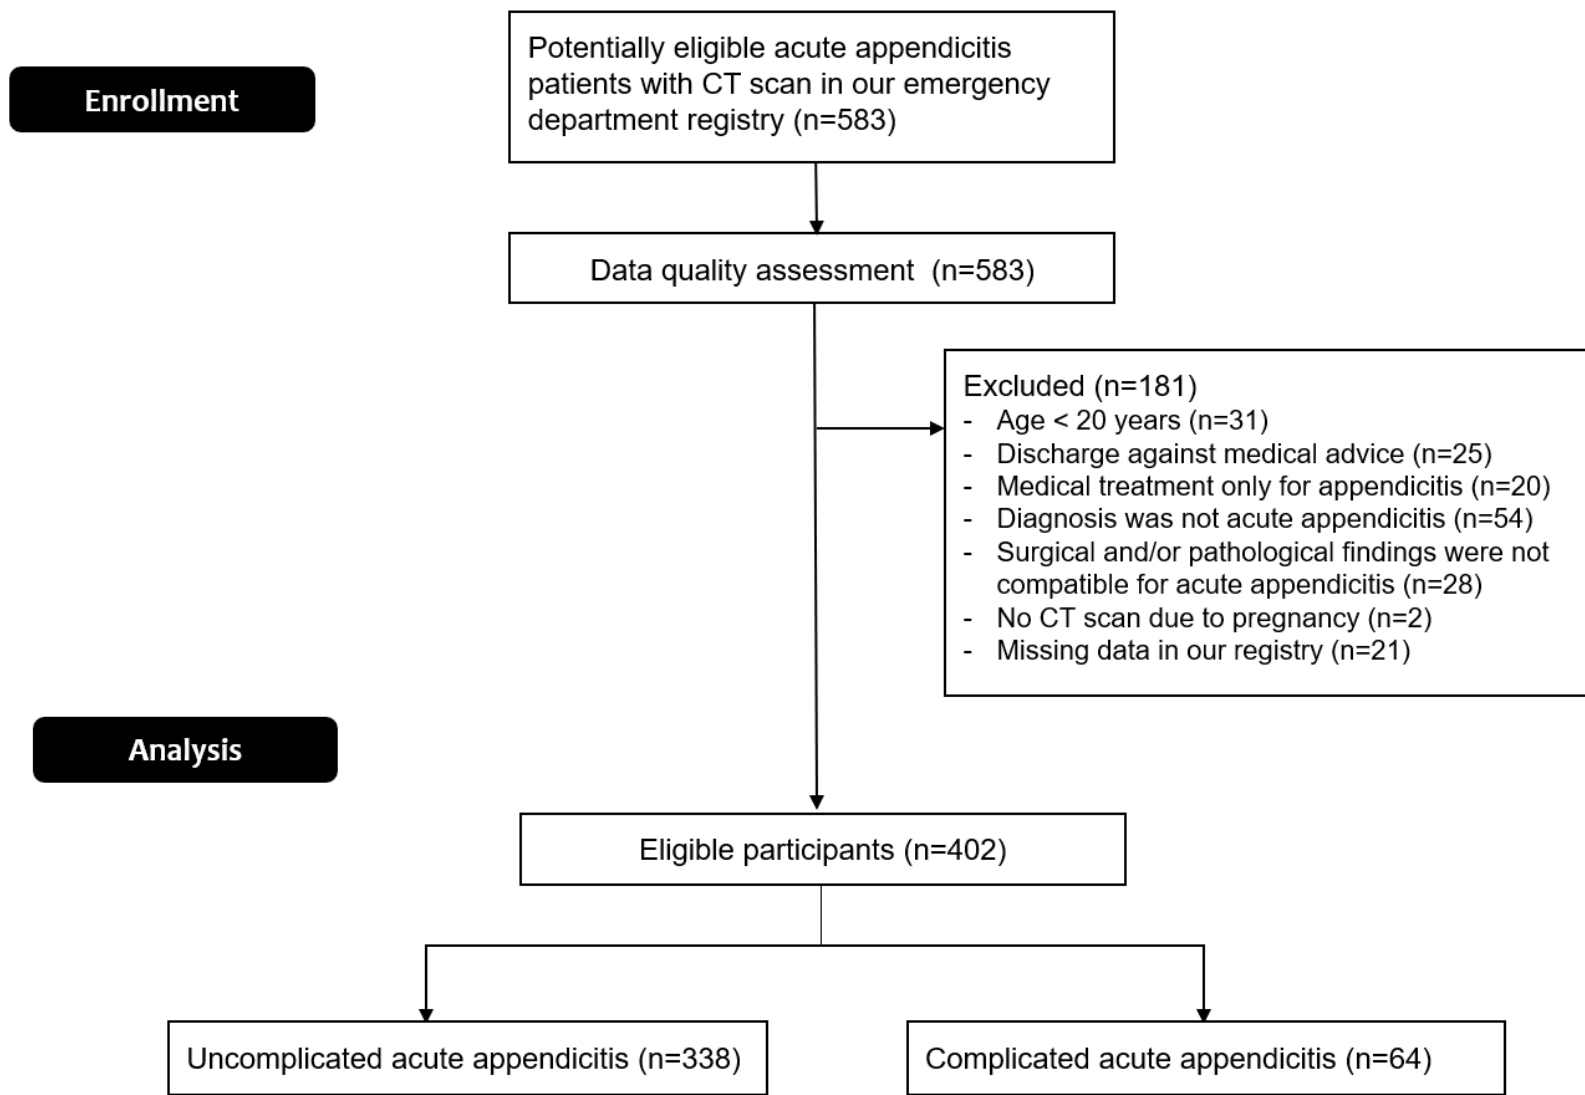

CT, computed tomography

Online Figure S1. Flow diagram of the study.

**(a) Original Adult Appendicitis Score**

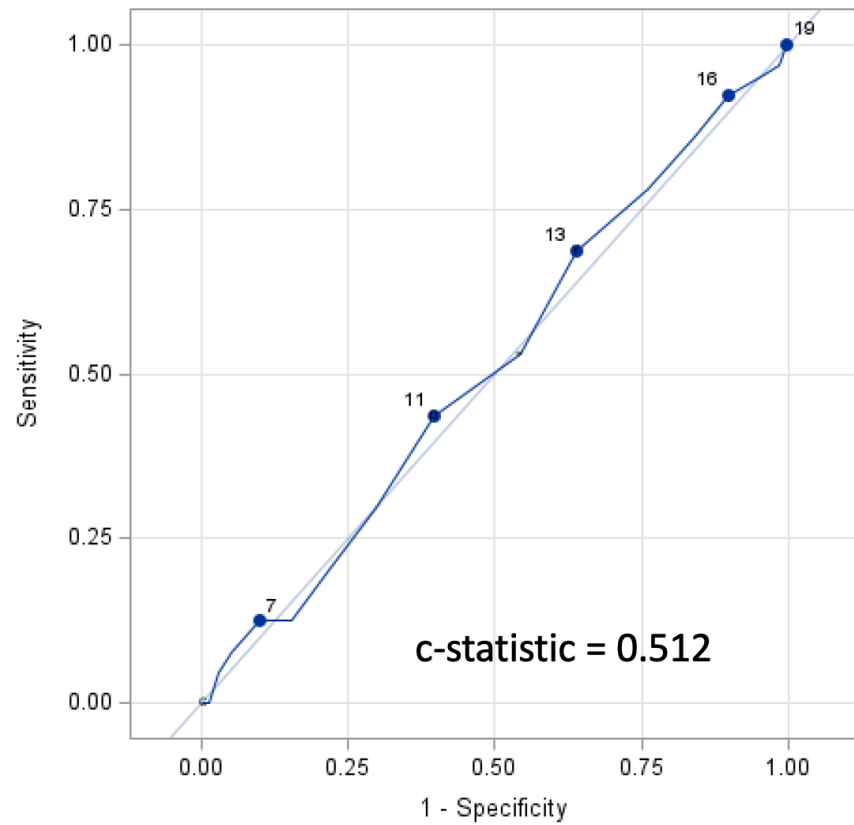

**(b) Modified Adult Appendicitis Score**

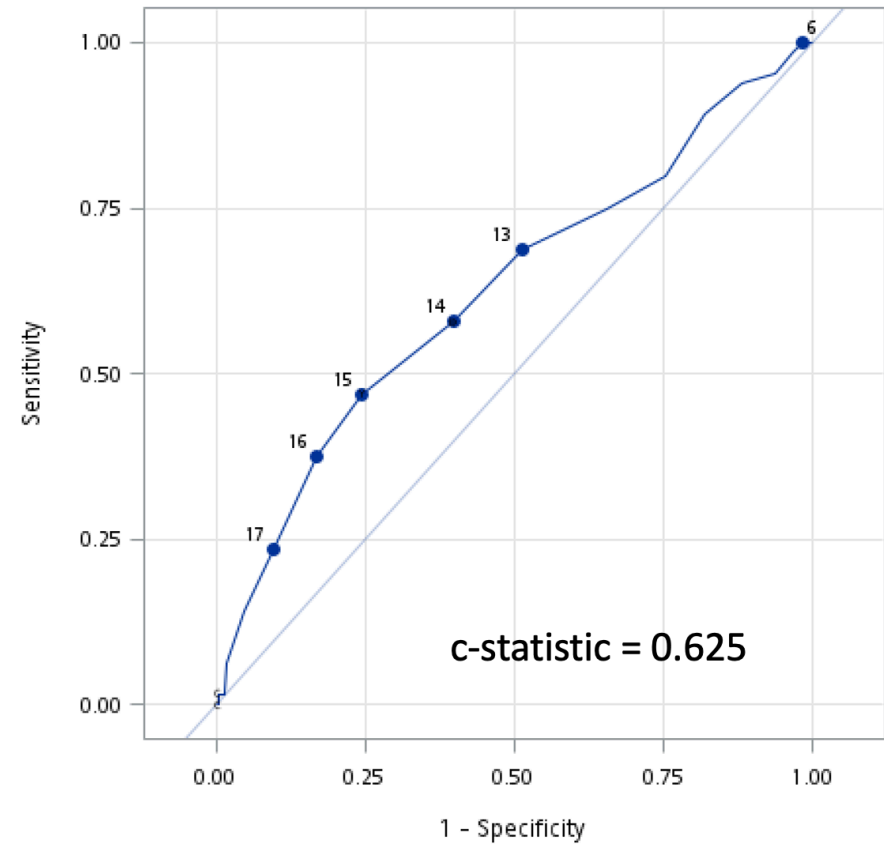

Online Figure S2. Receiver of operating characteristic curves of the Adult Appendicitis Score (AAS) for predicting complicated acute appendicitis.
